# Supplementary material for: Quantitative phosphoproteomic analysis of acquired cancer drug resistance to pazopanib and dasatinib
Source: PubMed Central journal article supplement (PMC5673060; doi:10.1016/j.jprot.2017.08.015), 2018-01-06
Supplement: mmc1.pdf [file mmc1.pdf]

**A**

PazR/A204

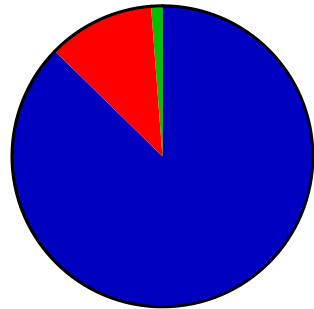

87% Ser  
12% Thr  
1% Tyr

DasR/A204

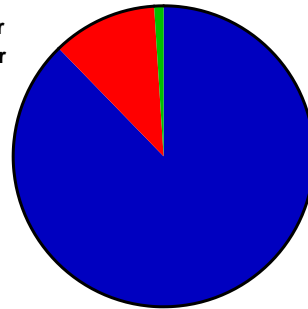

88% Ser  
11% Thr  
1% Tyr

**B**

PazR/A204

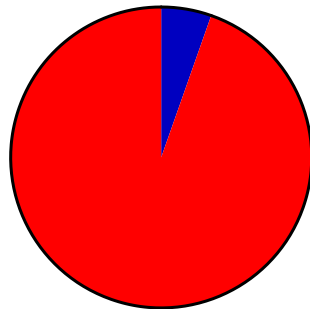

389 Novel  
6825 Known

DasR/A204

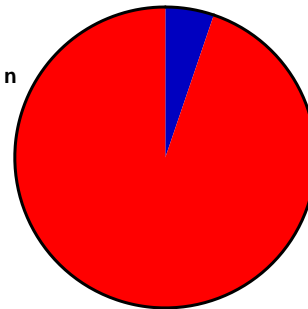

394 Novel  
7154 Known
