# Supplementary material for: Quantitative phosphoproteomic analysis of acquired cancer drug resistance to pazopanib and dasatinib
Source: PubMed Central journal article supplement (PMC5673060; doi:10.1016/j.jprot.2017.08.015), 2018-01-06

**PazR Wong et al**

**A204 PazR**

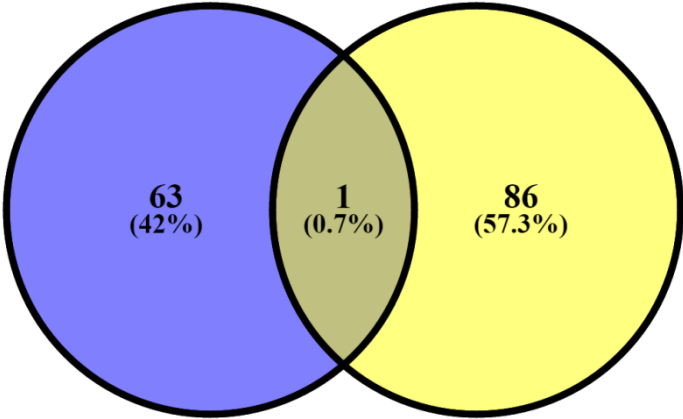

**DasR Wong et al**

**A204 DasR**

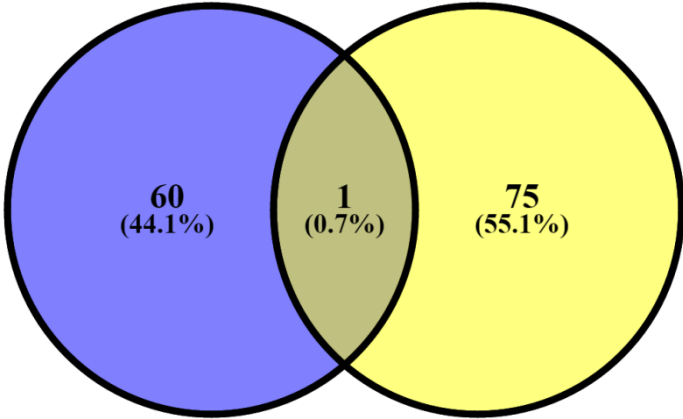

Supplement: mmc2.pdf [file mmc2.pdf]
